# Supplementary material for: VCAM-1–targeted MRI Improves Detection of the Tumor-brain Interface
Source: PubMed Central journal article supplement (PMC9662863; doi:10.1158/1078-0432.ccr-21-4011), 2022-03-01
Supplement: ccr-21-4011_figure_s2_supps2.pdf [file ccr-21-4011_figure_s2_supps2.pdf]

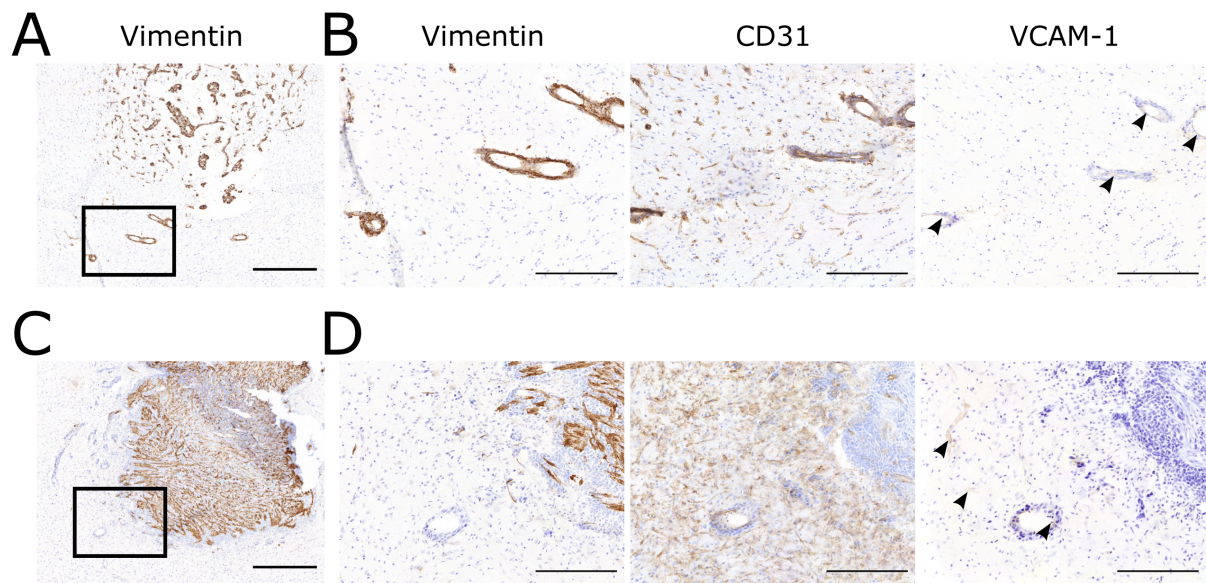

**Fig S2. Both MDA231Br-GFP and U87 intracranial tumors demonstrate regions with a poorly demarcated border. (A)** Example digital micrograph of a MDA231Br-GFP intracranial tumor, stained for vimentin (brown color), with an infiltrative border at the brain tumor-brain parenchyma interface. Scale bar = 500  $\mu\text{m}$ ; Black window highlights clusters of tumor cells that have escaped from the main tumor mass. **(B)** Higher powered magnification digital micrographs of the irregular border in serial tissue sections illustrate the specific staining (brown color) for vimentin (tumor cells), CD31 (blood vessels) and endothelial VCAM-1 (arrowheads). Scale bar = 200  $\mu\text{m}$ . **(C-D)** A similar observation was seen with the U87MG model.
