# Supplementary material for: VCAM-1–targeted MRI Improves Detection of the Tumor-brain Interface
Source: PubMed Central journal article supplement (PMC9662863; doi:10.1158/1078-0432.ccr-21-4011), 2022-03-01
Supplement: ccr-21-4011_figure_s3_supps3.pdf [file ccr-21-4011_figure_s3_supps3.pdf]

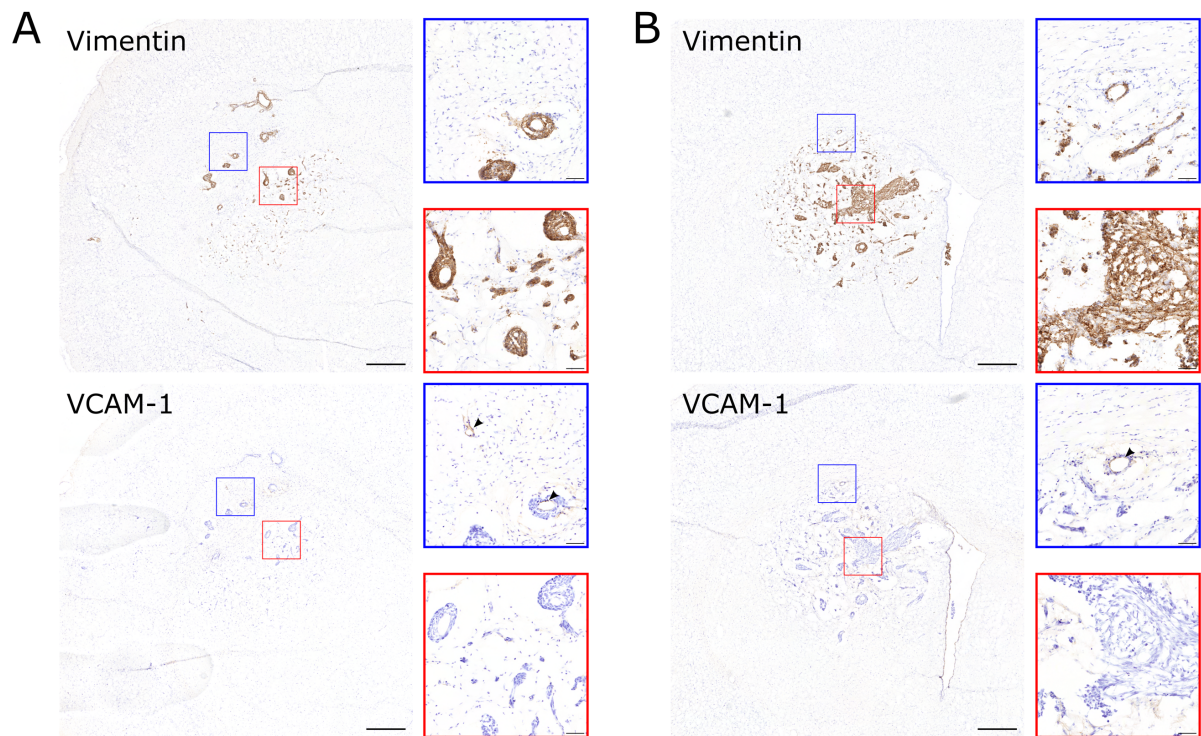

**Fig S3. Endothelial VCAM-1 is associated with the tumor invasive rim in MDA231Br-GFP models.** Brightfield digital micrographs of MDA231Br-GFP tumor sections in mouse brain immunohistochemically stained (brown) for either Vimentin (tumor cells) or VCAM-1 (endothelial cells; black arrowheads), corresponding to animals from Fig 3A (A) and Fig 3B (B). Scale bar = 500  $\mu\text{m}$ . Blue and red boxes correspond to high-power magnification images of the tumor rim and tumor core, respectively. Scale bar = 50  $\mu\text{m}$ .
