# Supplementary material for: VCAM-1–targeted MRI Improves Detection of the Tumor-brain Interface
Source: PubMed Central journal article supplement (PMC9662863; doi:10.1158/1078-0432.ccr-21-4011), 2022-03-01
Supplement: ccr-21-4011_figure_s4_supps4.pdf [file ccr-21-4011_figure_s4_supps4.pdf]

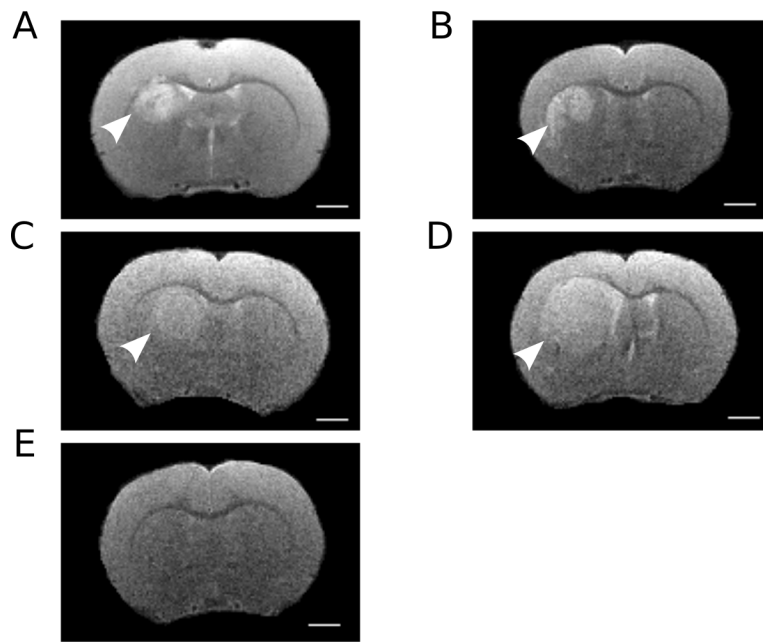

**Fig S4.  $T_2$ -weighted MRI permits tumor localization.** Corresponding  $T_2$ -weighted images for MDA231Br-GFP tumor bearing rat brains from Fig 3, prior to (A) VCAM-MPIO and (B) IgG-MPIO administration. Corresponding  $T_2$ -weighted images for U87MG tumor bearing rat brains from Fig 4, prior to (A) VCAM-MPIO and (B) IgG-MPIO administration. (E) Corresponding  $T_2$ -weighted image for PBS injected rat brain from Fig 3C. White arrowhead denotes location of tumor; scale bar = 2 mm.
