# Supplementary material for: VCAM-1–targeted MRI Improves Detection of the Tumor-brain Interface
Source: PubMed Central journal article supplement (PMC9662863; doi:10.1158/1078-0432.ccr-21-4011), 2022-03-01
Supplement: ccr-21-4011_figure_s5_supps5.pdf [file ccr-21-4011_figure_s5_supps5.pdf]

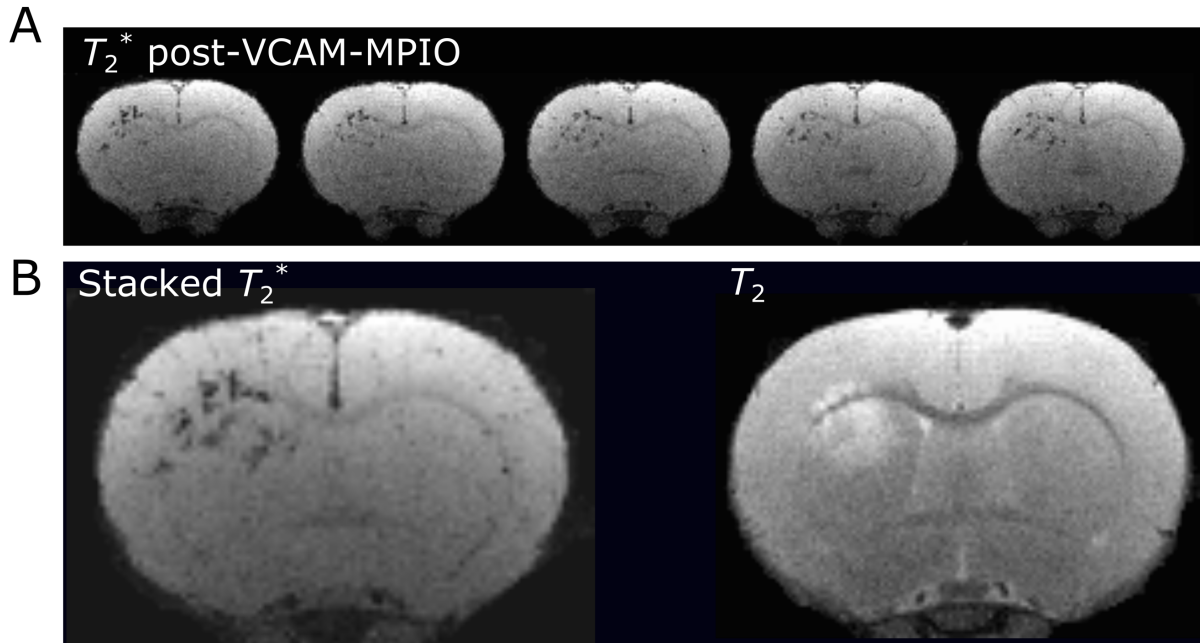

**Fig S5. VCAM-MPIO signal encompasses the tumor perimeter on  $T_2^*$ -weighted MRI. (A)**  $T_2^*$ -weighted MR images (slice thickness 120  $\mu\text{m}$  each) following VCAM-MPIO administration of a mouse brain containing an MDA231Br-GFP tumor, which have been (B) stacked to form a composite image and compared side-to-side with the corresponding  $T_2$ -weighted MR image from Fig 3G (slice thickness 500  $\mu\text{m}$ ).
