# Supplementary material for: VCAM-1–targeted MRI Improves Detection of the Tumor-brain Interface
Source: PubMed Central journal article supplement (PMC9662863; doi:10.1158/1078-0432.ccr-21-4011), 2022-03-01
Supplement: ccr-21-4011_figure_s6_supps6.pdf [file ccr-21-4011_figure_s6_supps6.pdf]

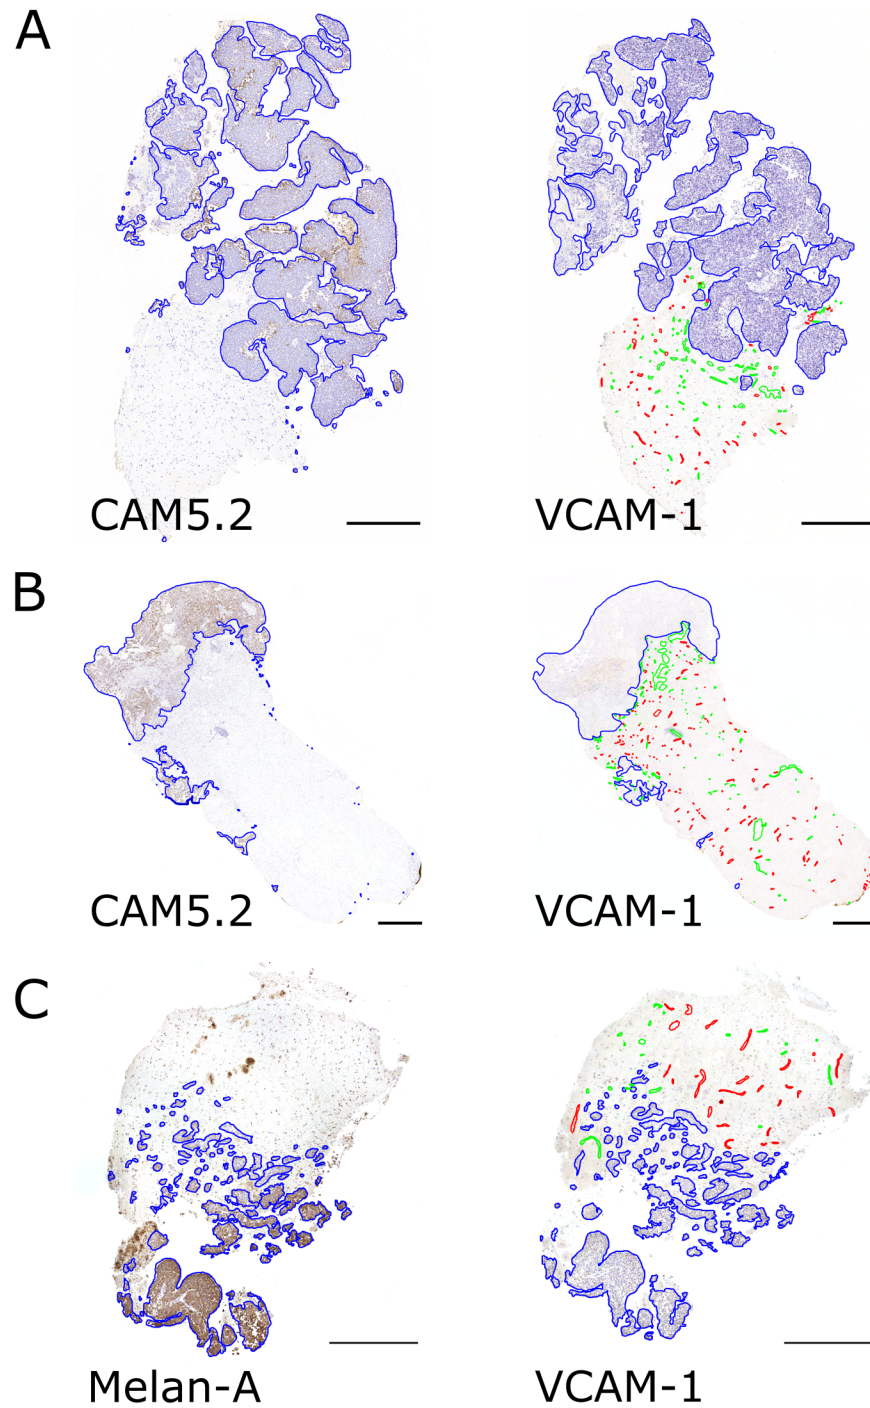

**Fig S6. Distribution of endothelial VCAM-1 staining in relation to brain metastasis margin.** Representative histological sections of human brain tissue containing metastases from (A) breast cancer, (B) lung adenocarcinoma and (C) melanoma primaries comparing the distribution of endothelial VCAM-1 in relation to the location of tumor cells; scale bar = 500

µm for breast and melanoma, and 1 mm for lung adenocarcinoma. Sections have been immunohistochemically stained for a tumor-specific marker – either CAM5.2 or melan-A (tumor area outlined in blue). Adjacent sections were immunohistochemically stained for VCAM-1; corresponding tumor area has been outlined in blue, VCAM-1 positive vessels outlined in green and VCAM-1 negative vessels outlined in red.
