# Supplementary material for: VCAM-1–targeted MRI Improves Detection of the Tumor-brain Interface
Source: PubMed Central journal article supplement (PMC9662863; doi:10.1158/1078-0432.ccr-21-4011), 2022-03-01
Supplement: ccr-21-4011_figure_s7_supps7.pdf [file ccr-21-4011_figure_s7_supps7.pdf]

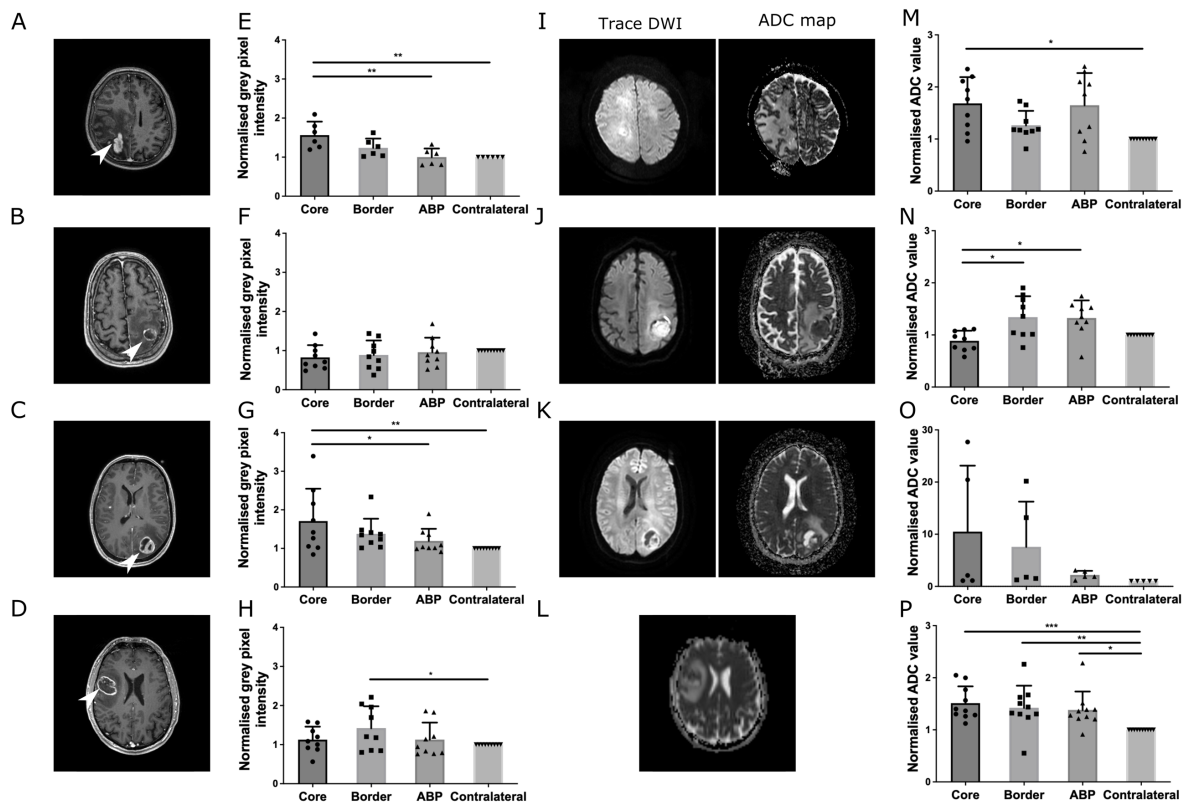

**Fig S7. Gadolinium contrast enhanced  $T_1$ -weighted and diffusion-weighted MRI measurements at the brain metastasis and glioblastoma border.** (A-D)  $T_1$ -weighted MR images, following i.v. gadolinium administration, of human patients with brain metastasis, from (A) breast cancer, (B) lung adenocarcinoma and (C) melanoma, and (D) glioblastoma. (E-H) Corresponding graphs showing mean pixel signal intensity ( $\pm$  standard deviation; SD) at the tumor core, tumor border and adjacent brain parenchyma (ABP) normalized to the contralateral brain;  $n = 6$  (breast),  $n = 8$  (lung),  $n = 9$  (melanoma) and  $n = 9$  (glioblastoma). (I-L) Diffusion-weighted images (DWI) from the same patients as above, and the corresponding apparent diffusion coefficient (ADC) maps generated from the diffusion-weighted images. ADC maps alone was generated for the glioblastoma cohort. (M-P) Corresponding graphs showing mean ADC values ( $\pm$  SD) at the tumor core, tumor border and ABP. \* $p < 0.05$ , \*\* $p < 0.01$ ; post-hoc Tukey multiple comparisons test. White arrowhead denotes location of tumor.
